# Supplementary material
Source: Springer Nature journal article supplement (https://www.springermedizin.de/resource/supplementary/12936_2012_2524_MOESM4_ESM.pdf/9543028)

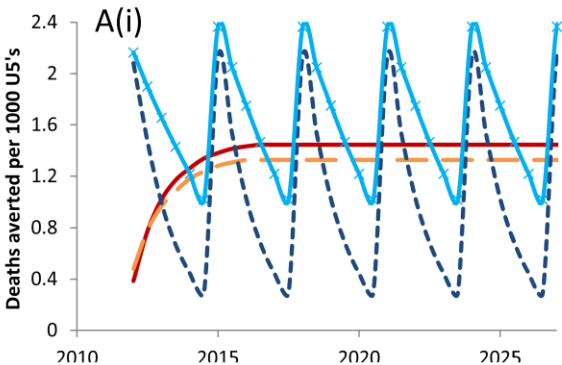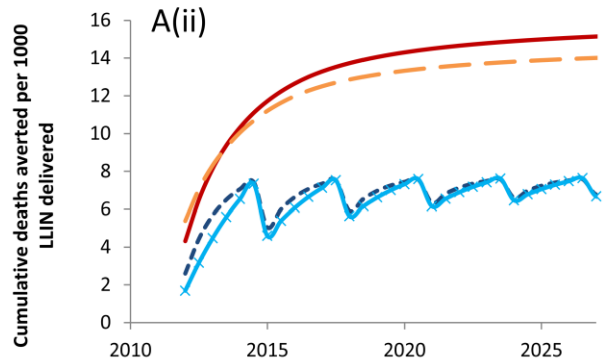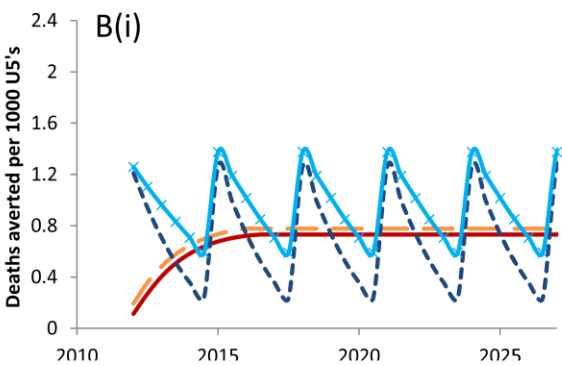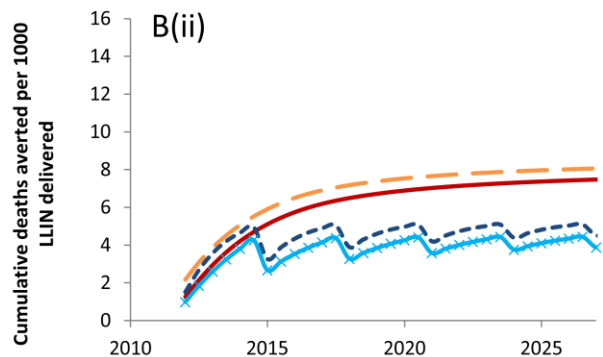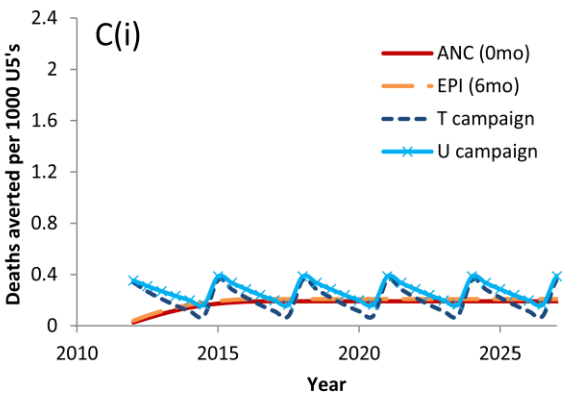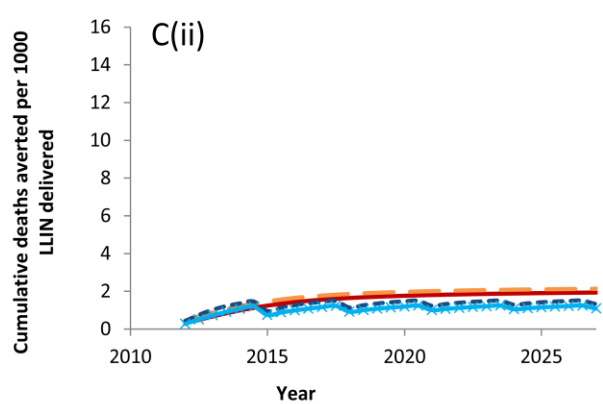

Supplement: MOESM4 [file 9543028]
